# Supplementary material
Source: Elsevier journal article supplement (https://www.sciencedirect.com/science/article/pii/S238702062030156X)
Supplement: mmc1 [file S238702062030156X:mmc1.docx]

***Tabla Suplementaria 1: Actividad transfusional global en el centro.***

| **Año** | 2001 | 2002 | 2003 | 2004 | 2005 | 2006 | 2007 | 2008 | 2009 |
| --- | --- | --- | --- | --- | --- | --- | --- | --- | --- |
| CH Tr. | 9043 | 7983 | 8423 | 9232 | 9565 | 10873 | 10657 | 10715 | 11492 |
| *Nº Pac.* | 1657 | 1494 | 1632 | 1796 | 1842 | 1904 | 1923 | 2014 | 2022 |
| Pac. RhD neg Tr. | 390  (23%) | 301  (20%) | 358  (22%) | 408  (23%) | 366  (20%) | 413  (22%) | 444  (23%) | 440  (22%) | 469  (23%) |
| **Año** | 2010 | 2011 | 2012 | 2013 | 2014 | 2015 | 2016 | 2017 | 2018 |
| CH Tr. | 12043 | 12888 | 15741 | 16568 | 16902 | 16091 | 16561 | 14955 | 15400 |
| *Nº Pac.* | 2104 | 2212 | 2635 | 3026 | 3226 | 4199 | 4292 | 4114 | 3258 |
| Pac. RhD neg Tr. | 460  (22%) | 467  (21%) | 502  (19%) | 409  (13%) | 337  (10%) | 825  (21%) | 730  (17%) | 781  (19%) | 619  (19%) |

*CH Tr.- Número de concentrados de hematíes transfundidos*

*Nª Pac. – Número de pacientes transfundidos*

*Pac. D neg Tr. – Número total de pacientes RhD negativo transfundidos*

***Tabla Suplementaria 2: Diagnósticos de los pacientes transfundidos y porcentaje de mortalidad***

| **Diagnóstico** | **N (%)** | **Mortalidad** |
| --- | --- | --- |
| Onco-hematología | 43 (17,3%) | 35 (81,4%) |
| Transfusión masiva | 24 (9,7%) | 17 (70,8%) |
| Patología digestiva no neoplásica | 34 (13,7%) | **30 (88,2%)** |
| Cirugía programada | 96 (38,7%) | 48 (50,0%) |
| Otras anemias | 51 (20,6%) | 40 (78,4%) |
| Diagnóstico desconocido | 4 (1,6%) | *ND* |

N: número; ND: no disponible
